# Supplementary material for: A low-cost miniature immunosensor for haemoglobin as a device for the future detection of gastrointestinal bleeding
Source: Royal Society of Chemistry journal article supplement (doi:10.1039/d3an02147e), 2024-01-01
Supplement: d3an02147e1.pdf [file d3an02147e1.pdf]

## Supplementary Information

# A low-cost miniature immunosensor for haemoglobin as a device for the future detection of gastrointestinal bleeding

Alper Demirhan<sup>a</sup>, Iva Chianella<sup>b</sup>, Samadhan B Patil<sup>c,d</sup> and Ata Khalid<sup>a\*</sup>

<sup>a</sup>Center of Electronic Warfare, Information and Cyber, Cranfield University, Defence Academy of the  
United Kingdom, Shrivenham SN6 8LA, U.K.

<sup>b</sup>Surface Engineering and Precision Centre, School of Aerospace, Transport and Manufacturing, Cranfield  
University, Bedford MK43 0AL, U.K.

<sup>c</sup>School of Physics, Engineering and Technology, University of York, York YO10 5DD, U.K.

<sup>d</sup>York Biomedical Research Institute (YBRI), University of York, York YO10 5DD, U.K.

**\*Corresponding Author:** [ata.khalid@cranfield.ac.uk](mailto:ata.khalid@cranfield.ac.uk)

## S1 Comparison with literature

EIS technique requires a signal generator that can generate low amplitude AC signals, and a frequency response analyzer that works synchronously with the signal generator to measure the response of the sensor. Although current commercial devices are unsuitable for use as ingestible sensors since they are bulky, expensive, and power hungry, numerous studies have proposed small size devices which can be converted to an ingestible EIS sensor. Several researchers<sup>1-4</sup> have suggested using an AD5933 (7.8x6.2x2 mm, £17, Analog Devices, USA) chip which includes a 12-bit, 1 MSPS current-output DDS (direct digital synthesizer) as a signal generator, and a 12-bit ADC (analog-to-digital converter) with on-board discrete Fourier transform (DFT) engine for signal acquisition. Frequency resolution of the chip is 27 bits and capable of generating frequencies less than 0.1 Hz. However, it is only capable of measuring impedances from 100  $\Omega$  to 10 M $\Omega$ . Also, its 1 MSPS sampling rate is not enough to generate high-quality sinusoidal waves and its ADC resolution is 12-bits which makes it harder to measure low level signals. Brown et al. (2022) has suggested using an ADuCM355 (7.8x6.2x2 mm<sup>2</sup>, £19, Analog Devices, USA) which is a system-on-chip device including an ARM Cortex-M3 microprocessor with other peripherals to implement EIS and voltammetric protocols. It includes a waveform generator, and an on-board ADC and DFT engine to read and analyze the data. It can generate frequencies less than 1 Hz to 200 kHz. Impedance measurement range is from 0.4  $\Omega$  to 10 M $\Omega$ . Some researchers suggested using a built-in DAC (digital-to-analog converter) and ADC of microcontrollers<sup>6</sup>. But built-in DACs and ADCs in general purpose microcontrollers have sampling rates generally less than 2 MSPS and resolution generally less than 12 bits. Gervasoni et al.<sup>7</sup> suggested using a high-speed external DAC and ADC but this method is expensive and requires high-speed processors such as FPGA (field programmable gate array) which are power-hungry devices. All these works use a digital lock-in amplifier or DFT which demodulate the signal after it is converted to a digital value by ADC. However, higher sampling rate and resolution results in cost and power trade-offs in these methods. Comparison of the devices is given at Table S1.

**Table S1.** Comparison with literature

| <b>Reference</b>                | <b>Cost</b> | <b>Size (mm<sup>2</sup>)</b> | <b>Frequency Range</b> | <b>AC Output Range (mV<sub>RMS</sub>)</b>                       |
|---------------------------------|-------------|------------------------------|------------------------|-----------------------------------------------------------------|
| Our Device                      | £31         | 33x20<br>(19x7.9 in capsule) | DC -100 kHz            | 1-30 or 10-300 (depends on selected DDS I/V converter resistor) |
| Zhang et al. <sup>1</sup>       | N.A         | N.A                          | 10 Hz-10 kHz           | 200 mV (fixed)                                                  |
| Chuang et al. <sup>2</sup>      | N.A.        | N.A                          | 1 kHz- 100 kHz         | N.A                                                             |
| Salahandish et al. <sup>3</sup> | \$80        | 83x60                        | 1 Hz-5 kHz             | 10                                                              |
| Liu et al. <sup>4</sup>         | \$100       | N.A.                         | 1-100kHz               | 1.99, 0.97, 0.383, 0.198 (V <sub>p-p</sub> )                    |
| Brown et al. <sup>5</sup>       | \$60        | 26x68                        | 16 mHz- 200 kHz        | N.A.                                                            |
| Pruna et al. <sup>6</sup>       | \$300       | 120x70                       | 0.1 Hz-10 kHz          | 500                                                             |
| Jenkins et al. <sup>8</sup>     | \$105       | 74x89                        | DC-100 kHz             | 10 -100 (4 pre-programmed)                                      |
| Sensit Smart <sup>9</sup>       | \$1250      | 43x25                        | 16 mHz- 200 kHz        | 1-250                                                           |

## S2 Cost of materials for the EIS device

**Table S2.** Cost of the materials

| <b>Name</b>      | <b>Description</b>                      | <b>Quantity</b> | <b>Unit price (£)</b> | <b>Total (£)</b> |
|------------------|-----------------------------------------|-----------------|-----------------------|------------------|
| Passive elements | Resistors, capacitors,<br>and inductors | 44              | 0.01                  | 0.44             |
| AD9834           | DDS                                     | 1               | 12.11                 | 12.11            |
| EFM8LB12         | MCU                                     | 1               | 1.23                  | 1.23             |
| MAX5394          | Digital Potentiometer                   | 2               | 1.61                  | 3.22             |
| MCP3561          | 24-bit ADC                              | 1               | 2.62                  | 2.62             |
| P15A3157         | Analog switch                           | 2               | 0.3                   | 0.6              |
| DS1020-05        | Electrode Connector                     | 1               | 0.2                   | 0.2              |
| FT200XD          | USB/I2C converter                       | 1               | 1.73                  | 1.73             |
| USB connector    | USB Mini-b connector                    | 1               | 1.31                  | 1.31             |
| OPA4354          | Quad Op-amp                             | 2               | 2.6                   | 5.2              |
| LP2985           | 4.5 V LDO                               | 1               | 0.85                  | 0.85             |
| MCP1700          | 3.3 V LDO                               | 1               | 0.41                  | 0.41             |
| PCB              | 4-layer circuit board                   | 1               | 1                     | 1                |

Total cost: £30.92

### S3 Dummy-cell measurements

Precision resistors which have 0.1% tolerance and 10 ppm/°C temperature coefficient in 0805 SMD package were used as dummy-cell.

**Table S3.** Mean and standard deviations of dummy-cell measurements

|                                  |           | Impedance            |                     | Phase                  |                       |
|----------------------------------|-----------|----------------------|---------------------|------------------------|-----------------------|
|                                  |           | Mean<br>( $\Omega$ ) | Std<br>( $\Omega$ ) | Mean<br>( $^{\circ}$ ) | Std<br>( $^{\circ}$ ) |
| <b>40 <math>\Omega</math></b>    | This work | 39.97                | 0.152               | -0.198                 | 0.162                 |
|                                  | PS-4      | 40.62                | 0.078               | -0.166                 | 0.457                 |
| <b>100 <math>\Omega</math></b>   | This work | 100.507              | 0.209               | 0.276                  | 0.227                 |
|                                  | PS-4      | 100.949              | 0.099               | -0.0484                | 0.185                 |
| <b>1000 <math>\Omega</math></b>  | This work | 996.421              | 0.977               | -0.126                 | 0.106                 |
|                                  | PS-4      | 998.033              | 1.494               | -0.878                 | 1.012                 |
| <b>10500 <math>\Omega</math></b> | This work | 10.496k              | 6.900               | 0.135                  | 0.166                 |
|                                  | PS-4      | 10.443k              | 156.547             | 1.707                  | 1.581                 |
| <b>51 k<math>\Omega</math></b>   | This work | 51.050k              | 63.464              | -0.735                 | 0.597                 |
|                                  | PS-4      | 49.129k              | 5.852k              | 11.581                 | 9.897                 |

## S4 Transimpedance amplifier

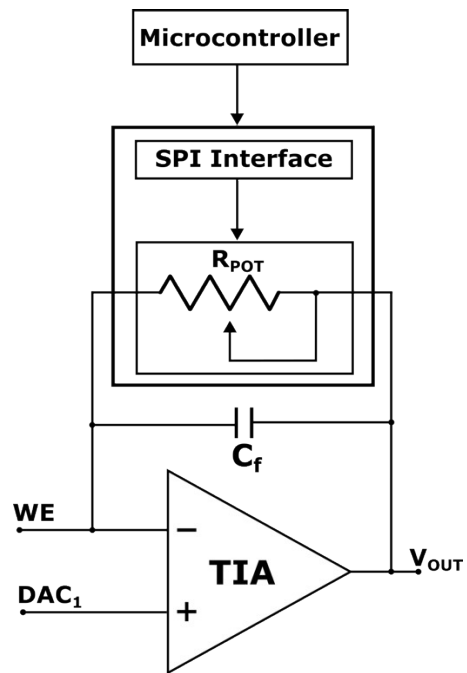

**Fig. S1.** Transimpedance amplifier and current gain circuitry.

## S5 Calibration procedure of the instrument

Six step calibration procedure was applied to calibrate the EIS device. The procedure is shown in Fig. S2.

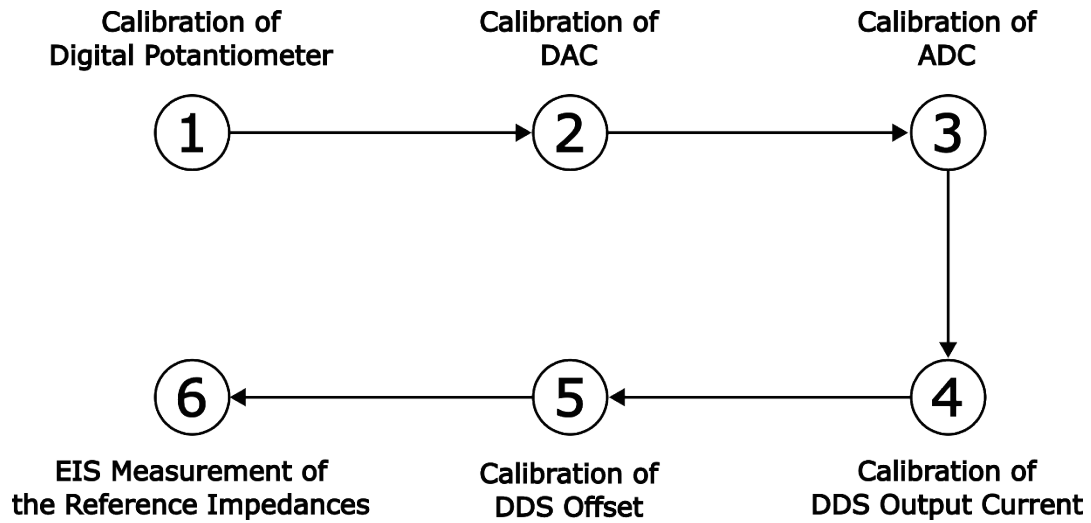

Fig. S2. Calibration procedure of the instrument.

## S6 Electrochemical characterisation

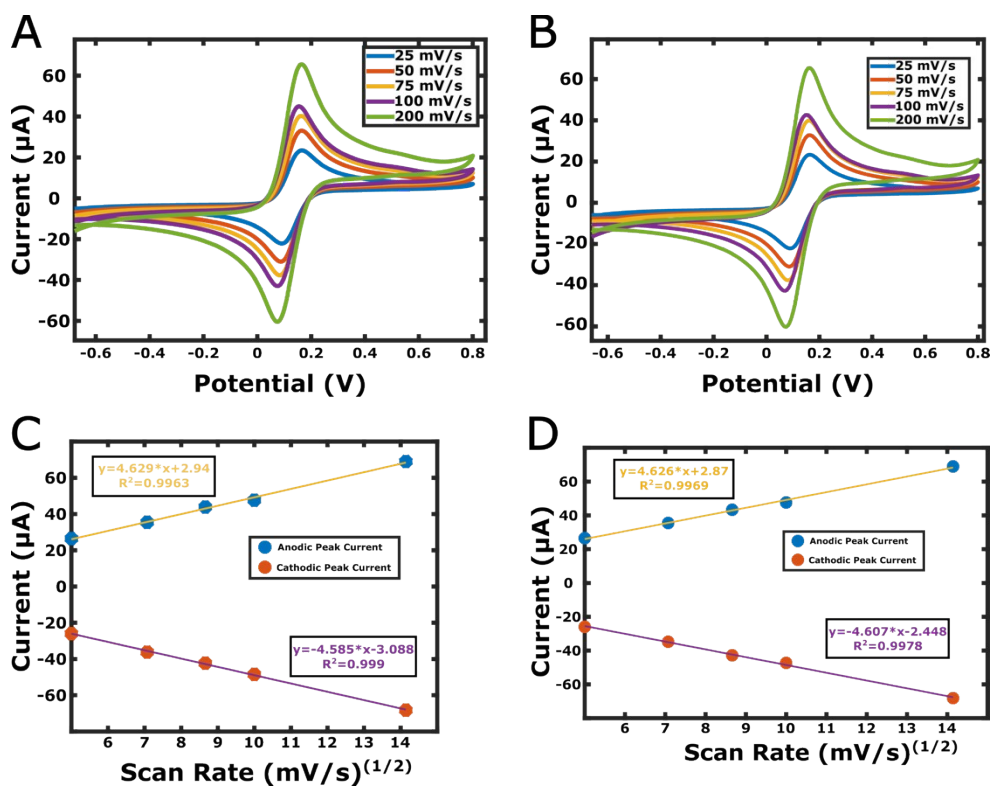

**Fig. S3.** Electrochemical characterization of the electrodes. A-B) CV measurements at different scan rates with our device and Palmsens-4, respectively. C-D) Relationship between peak current and square root of scan rate for our device and Palmsens-4, respectively.

**Table S4.** Randles equivalent circuit values.

|            | $R_{\text{sol}}$<br>(Ohm) | $R_{\text{charge-transfer}}$<br>(Ohm) | $W$<br>(Ohm $\text{sec}^{-1/2}$ ) | $Q$<br>(Ohm <sup>-1</sup> $\text{sec}^n$ ) | $n$  |
|------------|---------------------------|---------------------------------------|-----------------------------------|--------------------------------------------|------|
| Our Device | 58.37                     | 114.41                                | 175.56                            | 2.17                                       | 0.87 |
| PS-4       | 58.29                     | 108.15                                | 187.53                            | 2.05                                       | 0.88 |



## S7 Electrode modification

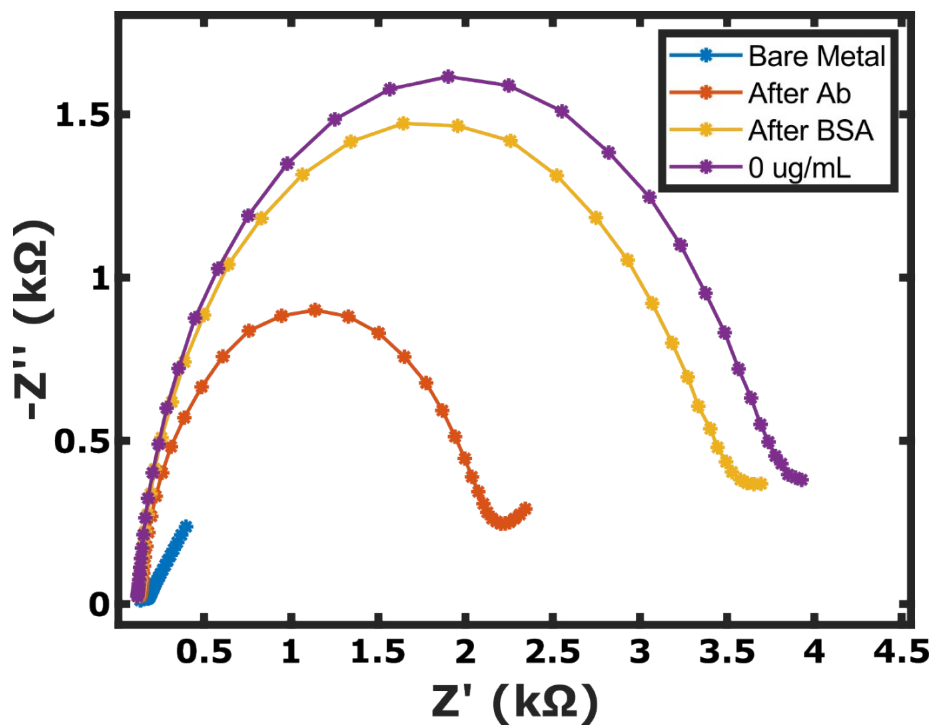

Fig. S4. Stepwise change after coating electrode surface.

Table S5. Change in Randles equivalent circuit parameters after each modification step.

| Electrode                     | $R_{sol}$ ( $\Omega$ ) | CPE           |              | $R_{CT}$<br>( $k\Omega$ ) | $W$<br>( $k\sigma$ ) |
|-------------------------------|------------------------|---------------|--------------|---------------------------|----------------------|
|                               |                        | Q ( $\mu T$ ) | n ( $\Phi$ ) |                           |                      |
| Bare Metal                    | 132.9                  | 0.15          | 1.1          | 0.03                      | 1.28                 |
| After antibody immobilisation | 138.4                  | 0.31          | 0.94         | 1900                      | 1.47                 |
| After BSA immobilisation      | 122.9                  | 0.34          | 0.93         | 3278                      | 1.59                 |

## S8 Antibody immobilisation optimisation

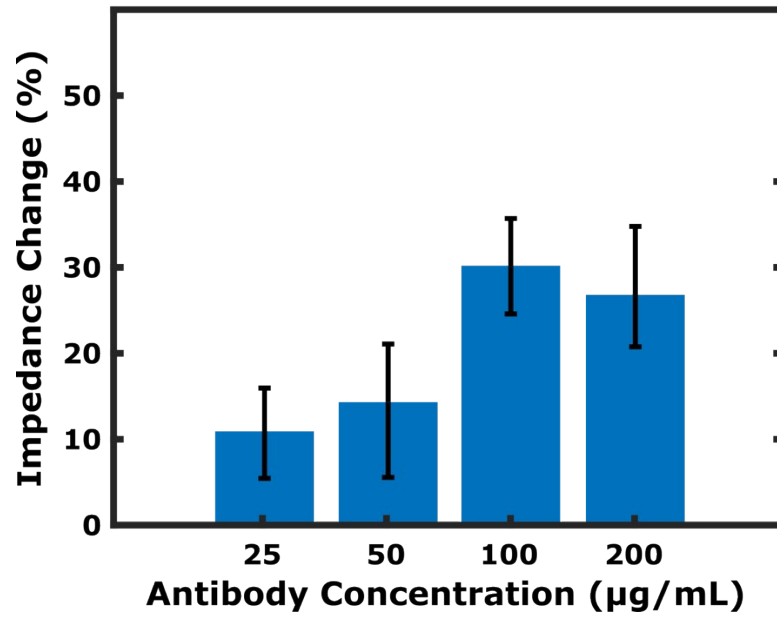

Fig. S5. Response of the sensor with different antibody concentrations.

### S9 Response of the sensor with and without antibody

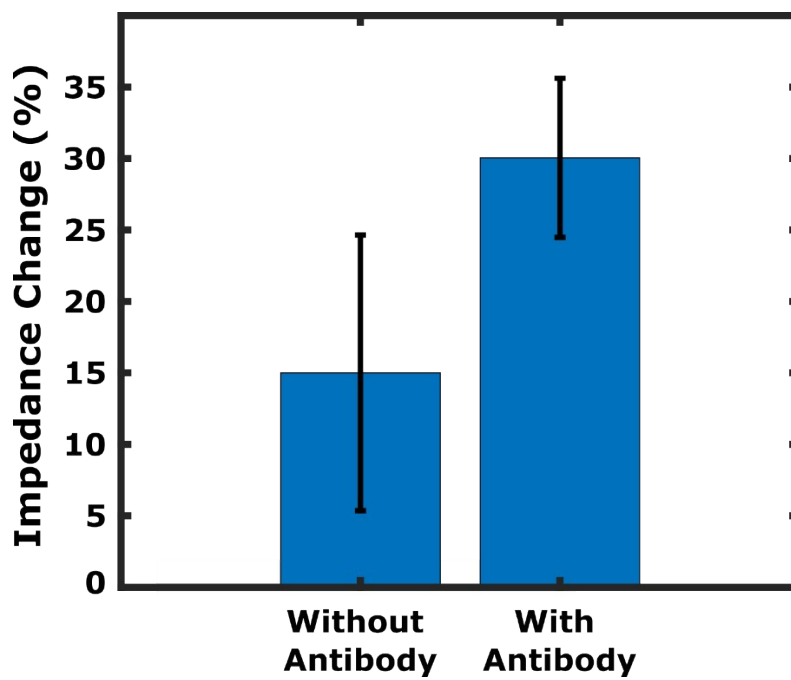

Fig. S6.  $10 \mu\text{g mL}^{-1}$  of Hb was measured when surface was covered with and without antibody.

## References

- 1 D. Zhang, Y. Lu, Q. Zhang, L. Liu, S. Li, Y. Yao, J. Jiang, G. L. Liu and Q. Liu, *Sens Actuators B Chem*, 2016, **222**, 994–1002.
- 2 C. H. Chuang, Y. C. Du, T. F. Wu, C. H. Chen, D. H. Lee, S. M. Chen, T. C. Huang, H. P. Wu and M. O. Shaikh, *Biosens Bioelectron*, 2016, **84**, 126–132.
- 3 R. Salahandish, F. Haghayegh, G. Ayala-Charca, J. E. Hyun, M. Khalghollah, A. Zare, B. Far, B. M. Berenger, Y. D. Niu, E. Ghafar-Zadeh and A. Sanati-Nezhad, *Biosens Bioelectron*, 2022, **203**, 114018.
- 4 X. Liu, C. Cheng, J. Wu, S. Eda and Y. Guo, *Biosens Bioelectron*, 2017, **90**, 83–90.
- 5 E. W. Brown, M. W. Glasscott, K. Conley, J. Barr, J. D. Ray, L. C. Moores and A. Netchaev, *Anal Chem*, 2022, **94**, 4906–4912.
- 6 R. Pruna, F. Palacio, A. Baraket, N. Zine, A. Streklas, J. Bausells, A. Errachid and M. López, *Biosens Bioelectron*, 2018, **100**, 533–540.
- 7 G. Gervasoni, M. Carminati and G. Ferrari, *Review of Scientific Instruments*, 2017, **88**, 104704.
- 8 D. M. Jenkins, B. E. Lee, S. Jun, J. Reyes-De-Corcuera and E. S. McLamore, *J Electrochem Soc*, 2019, **166**, B3056–B3065.
- 9 Basi Research Products online shop, <https://www.basinc.com/products/PALM-SENSIT-SMART> (accessed 31/10/2023)
